# Supplementary material for: Pressure-induced assemblies and structures of graphitic-carbon sheet encapsulated Au nanoparticles
Source: Royal Society of Chemistry journal article supplement (doi:10.1039/d0nr04443a), 2020-01-01
Supplement: d0nr04443a1.pdf [file d0nr04443a1.pdf]

### Supporting Information

## Pressure-induced Assemblies and Structures of Graphitic-Carbon Sheet Encapsulated Au Nanoparticles

Partha Pratim Das<sup>1</sup>, Sudeshna Samanta<sup>2,3</sup>, Douglas A. Blom<sup>4</sup>, Srikrishna Pramanik<sup>5</sup>, P.

Sujatha

Devi<sup>6</sup>,

Thomas

Vogt<sup>7</sup>,

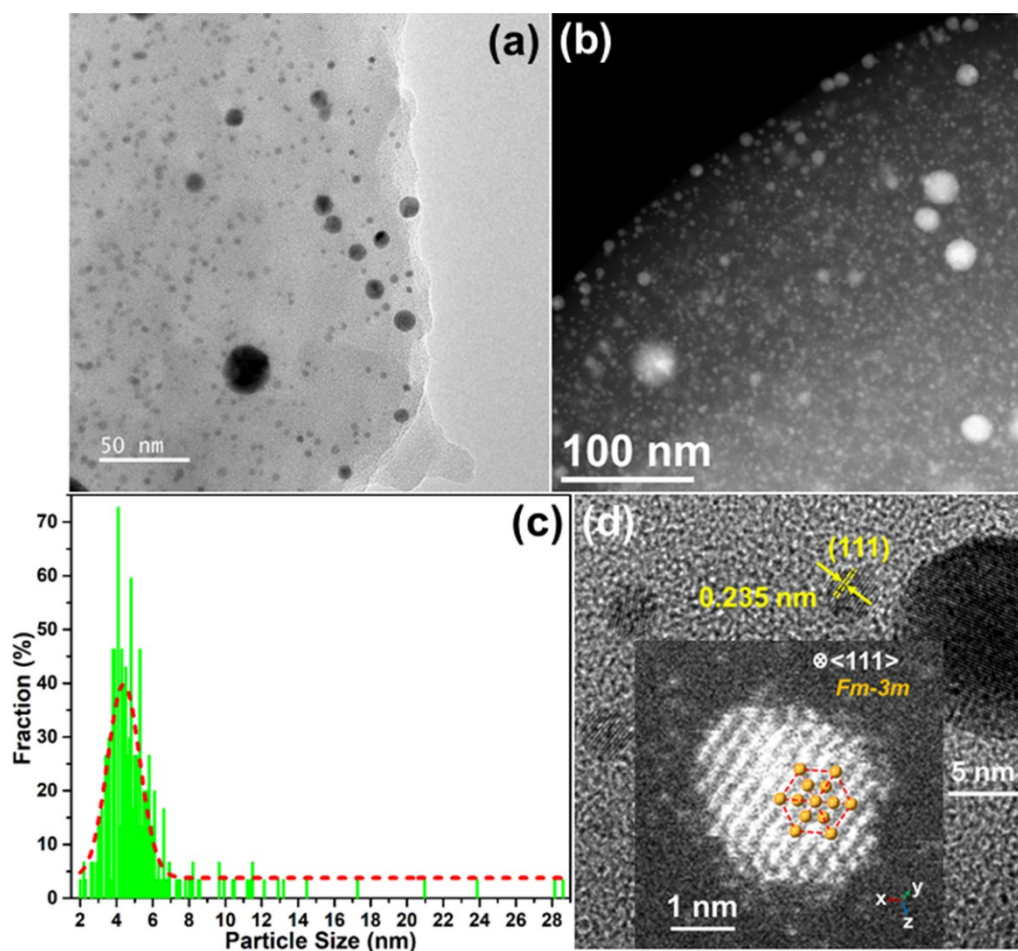

Yongjae Lee<sup>1,2,\*</sup>

**Fig. S1.** (a) Bright-field TEM image and (b) HAADF image of Au nanoparticles embedded in carbon sheets, (c) size distribution histogram of the Au nanoparticles (inset), (d) HRTEM image of the Au nanoparticles, HAADF image of the Au nanoparticle and the atomic structure model of *fcc* (*Fm-3m*) Au (inset).

**Calculation of strain:** We have estimated the pressure-induced evolution of the microscopic strain for the Au nanoparticles encapsulated by carbon sheet by the Williamson-Hall (W-H) plot. It describes as follows  $(\beta_{\text{obs}} - \beta_{\text{inst}}) \cos\theta = \lambda/D_v + 4\epsilon_{\text{str}} \sin\theta$ , where  $\beta_{\text{obs}}$ ,  $\beta_{\text{inst}}$ ,  $D_v$  and  $\epsilon_{\text{str}}$  respectively represents the observed and instrumental integral breadth regarding the Bragg angle  $2\theta$  of the *fcc* (*Fm-3m*) Au phase, the volume weighted crystallite size and the weighted strain. The distribution

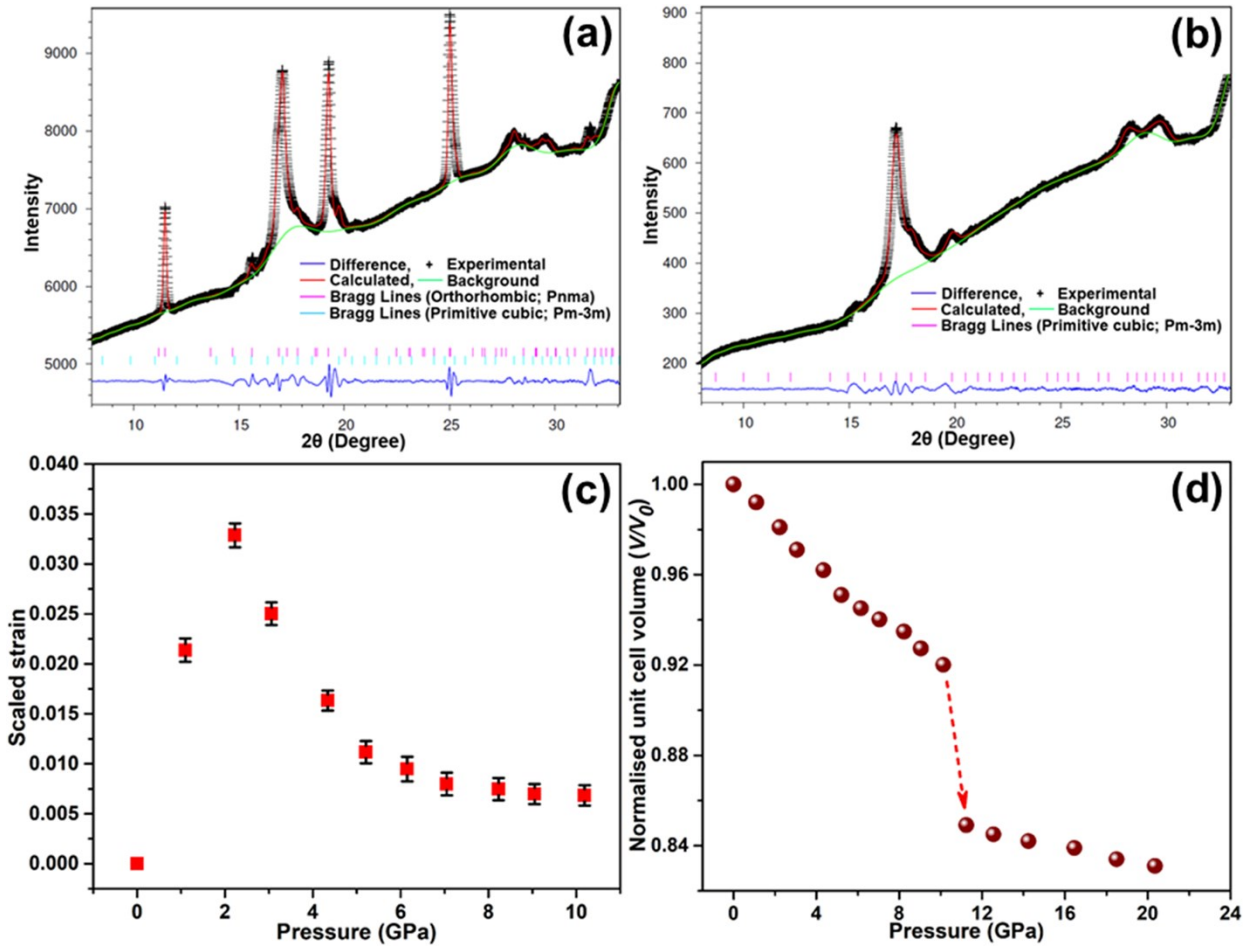

of strain with pressure is displayed as Figure S2(c).

**Fig. S2.** Whole profile fitting of X-ray diffraction patterns of the Au-carbon hybrid during compression at (a) ~14.2(1) and (b) ~22.1(1) GPa, (c) The scaled strain for the carbon sheet encapsulated Au nanoparticles analyzed from a Williamson-Hall plot, (d) variation in  $V/V_0$  of the

carbon of the hybrid with pressure.

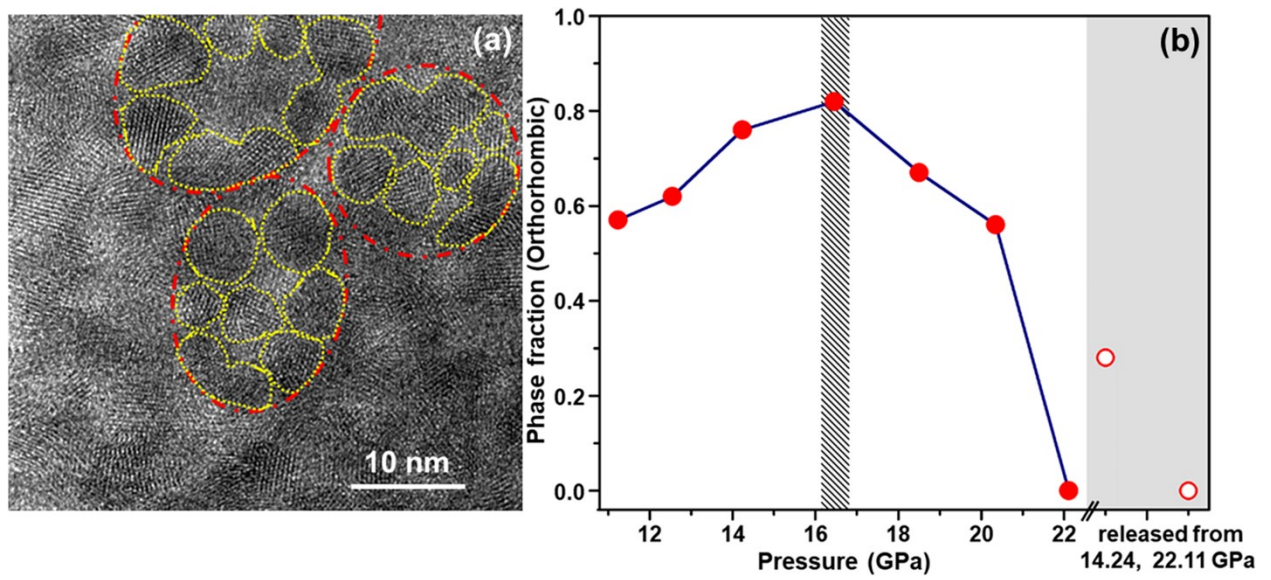

**Fig. S3** (a) TEM image of the Au-carbon hybrid released from  $\sim 14.2(1)$  GPa, (b) phase fraction of the orthorhombic structure of Au with pressure.
